# Supplementary material
Source: PubMed Central journal article supplement (PMC3361511)
Supplement: tran0301_0039SD1.pdf [file tran0301_0039SD1.pdf]

Supplemental Material to:

José García-Martínez, Guillermo Ayala, Vicent Pelechano, Sebastián Chávez, Enrique Herrero and José E. Pérez-Ortín. *Transcription* 2012; 3(1);

<http://dx.doi.org/10.4161/trns.3.1.19416>.

<http://www.landesbioscience.com/journals/transcription/article/19416/>

Figure S1

A

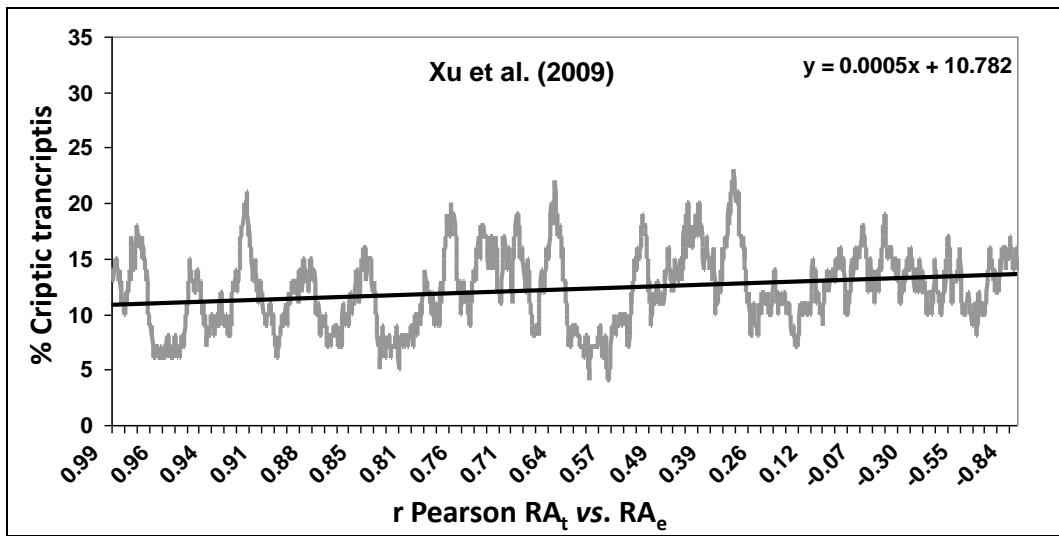

B

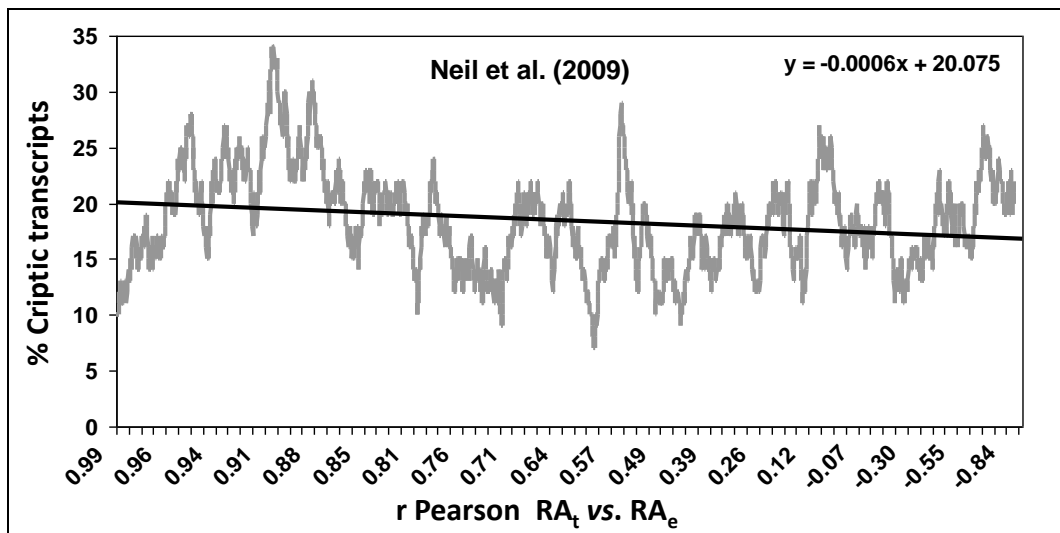

C

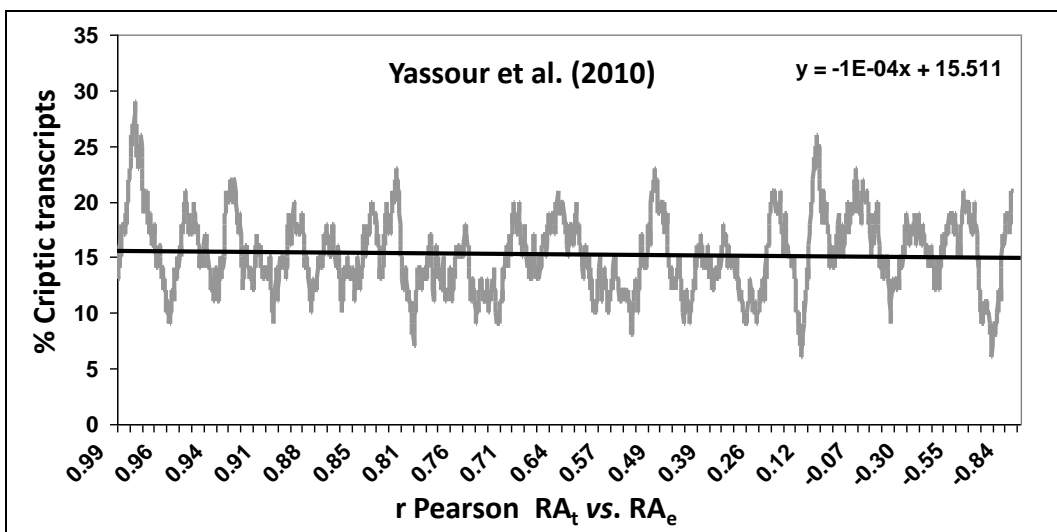

Figure S2

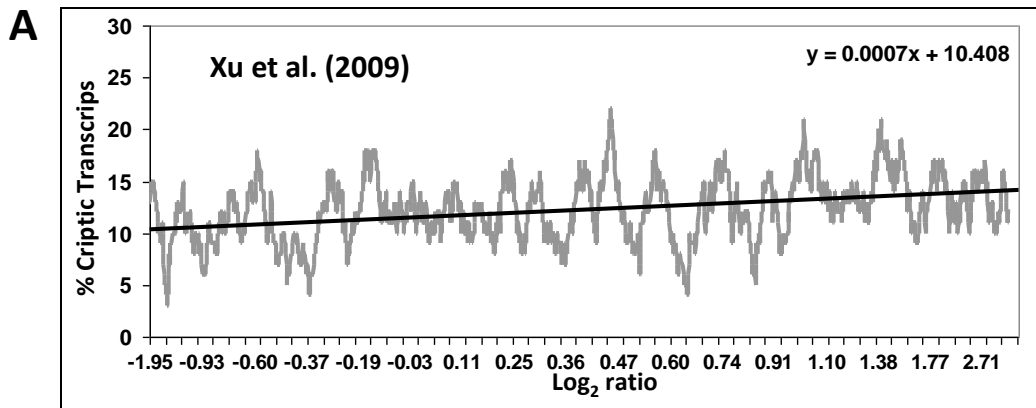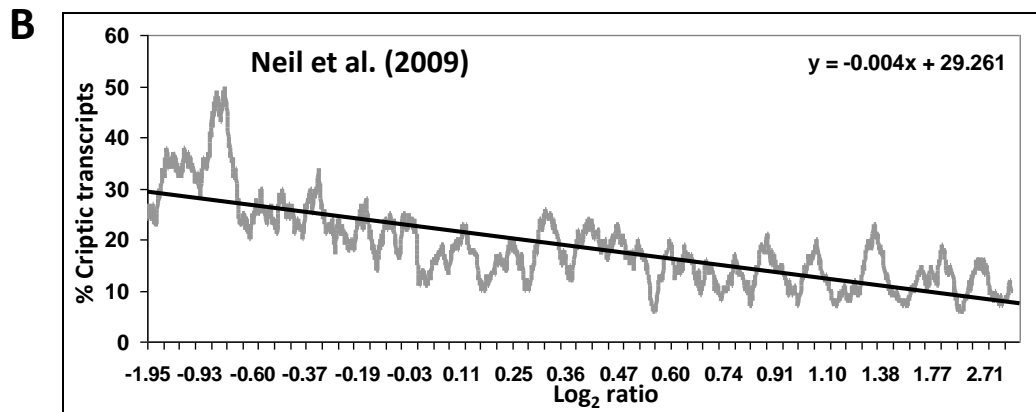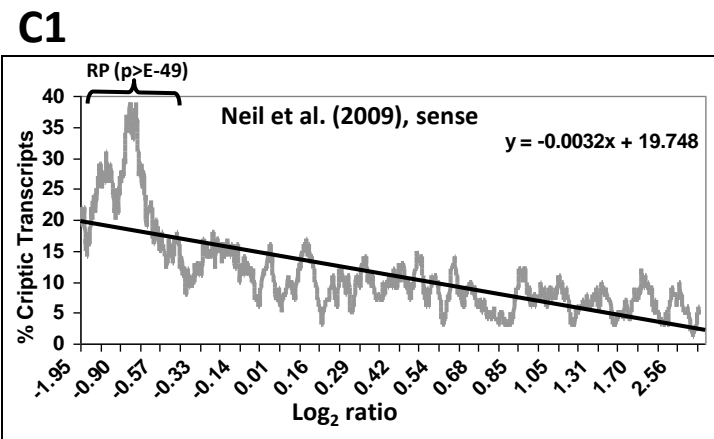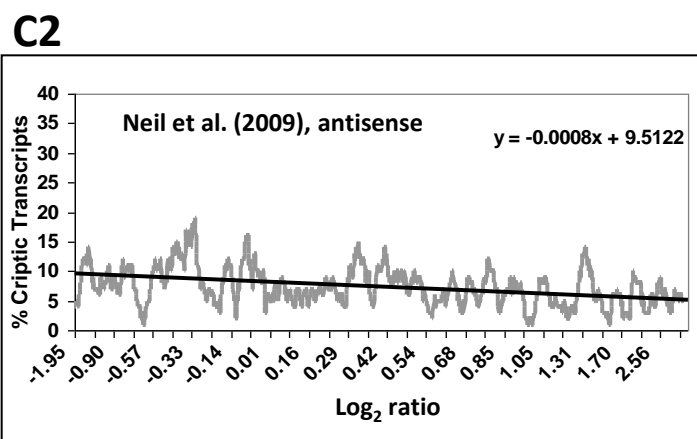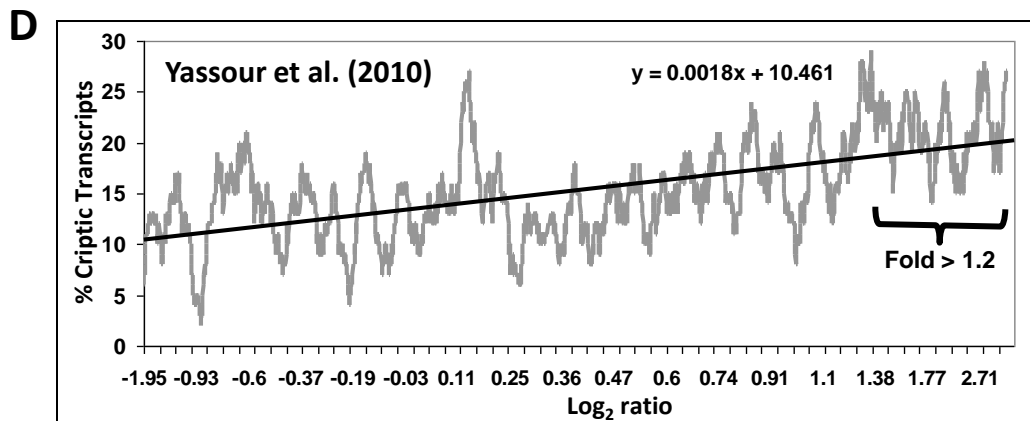

**Figure S1.** Cryptic transcription does not correlate with the differences between the transcription rate and mRNA profiles in heat stress response.

**Figure S2.** Different correlation patterns in comparisons between cryptic transcription datasets and change ratios after heat stress.
